# Supplementary material for: Genetic dissection of the relationships between grain yield components by genome-wide association mapping in a collection of tetraploid wheats
Source: PubMed Central journal article supplement (PMC5764242; doi:10.1371/journal.pone.0190162), 2018-01-11
Supplement: pone.0190162.s001.pdf [file pone.0190162.s001.pdf]

**S1 Table.** List of accessions of *T. turgidum* subspecies included in the wheat collection.

| <b>Taxonomic classification</b> | <b>Year of release</b> | <b>Accession</b> | <b>Country</b> | <b>Pedigree</b>                                                                                                                   |
|---------------------------------|------------------------|------------------|----------------|-----------------------------------------------------------------------------------------------------------------------------------|
| <i>T. turgidum</i>              | 1915                   | Cappelli         | Italy          | Strampelli selection from “Jean Retifah”                                                                                          |
| <i>ssp. durum</i>               | 1925                   | Aziziah          | Italy          | Selected from exotic landraces “Near East”                                                                                        |
|                                 | 1928                   | Russello         | Italy          | Selected from landraces Italian                                                                                                   |
|                                 | 1930                   | Timilia          | Italy, Sicily  | Selected from landraces of South Italy                                                                                            |
|                                 | 1934                   | Taganrog         | Italy          | Selected from landraces Russian                                                                                                   |
|                                 | 1940                   | Capeiti-8        | Italy          | Eiti 6/Cappelli                                                                                                                   |
|                                 | 1949                   | Grifoni          | Italy          | Cappelli/ <i>Triticum aestivum</i>                                                                                                |
|                                 | 1956                   | Kyperounda       | Marocco        | Selected from landraces                                                                                                           |
|                                 | 1956                   | Langdon          | United States  | Yuma ( <i>T. turgidum ssp durum</i> )/Stewart ( <i>T. turgidum ssp. durum</i> )/Carleton                                          |
|                                 | 1970                   | Hymera           | Italy          | B-14/Capeiti-8                                                                                                                    |
|                                 | 1970                   | Trinakria        | Italy          | B-14/Capeiti-8                                                                                                                    |
|                                 | 1973                   | Appulo           | Italy          | Cappelli/Grifoni/Capeiti-8                                                                                                        |
|                                 | 1973                   | Belfuggito       | Italy          | Conte Morando/3/ <i>T. turgidum ssp dicoccoides</i> /Duro Australiano// <i>T. persicum</i> var <i>ekinatum</i> / Duro Australiano |
|                                 | 1973                   | Lambro           | Italy          | Conte Morando/3/ <i>T. turgidum ssp dicoccoides</i> /Duro Australiano// <i>T. persicum</i> var <i>ekinatum</i> / Duro Australiano |
|                                 | 1974                   | Creso            | Italy          | Yaktana-54/Norin 10-B//2*Cappelli-63/3/3*Tehuacan-60/4/Capelli-B144                                                               |
|                                 | 1975                   | Isa              | Italy          | Sassari 0 130/Patrizio                                                                                                            |
|                                 | 1975                   | Mexicali 75      | Mexico         | Gerardo-VZ-469/3/Jori (SIB)//ND-61-130/Leeds                                                                                      |
|                                 | 1975                   | Mida             | Italy          | Yaktana-54/Norin 10-B//2*Cappelli-63/3/2*Tehuacan-60/4/Capelli-B144                                                               |
|                                 | 1975                   | Polesine         | Italy          | Forlani/Aziziah                                                                                                                   |
|                                 | 1975                   | Valgerardo       | Italy          | Giorgio-324//Senatore Cappelli/Yuma                                                                                               |
|                                 | 1975                   | Valnova          | Italy          | Giorgio-324//Senatore Cappelli/Yuma                                                                                               |
|                                 | 1976                   | Tito             | Italy          | Lakota/Castelporziano                                                                                                             |
|                                 | 1977                   | Sansone          | Italy          | Mara/Cappelli                                                                                                                     |
|                                 | 1980                   | Karel            | Italy          | Mx-198/Maristella                                                                                                                 |
|                                 | 1980                   | Produra          | United States  | Tremes-Molle-Enano/2*Tehuacan-60/3/Zenati-Bouteille/Wells/4/2*Barrigon-Yaqui-Enano/Tehuacan-60/Tacur-Tipo-125-E/2*Tehuacan-60     |
|                                 | 1980                   | Valforte         | Italy          | VZ-156/Cappelli/Yuma/2*Cappelli                                                                                                   |
|                                 | 1981                   | Berillo          | Italy          | <i>Haynaldia villosa</i> /3*Cappelli/5/Yakatana-54//Norin-10/Brevor/3/ST-464/6/2*Thatcher                                         |
|                                 | 1982                   | Appio            | Italy          | Cappelli/Gaviota/Yuma                                                                                                             |
|                                 | 1982                   | Athena           | Italy          | Ranieri/Jucci                                                                                                                     |
|                                 | 1982                   | Latino           | Italy          | Cappelli/Anhinga// <i>T. turgidum</i>                                                                                             |
|                                 | 1982                   | Messapia         | Italy          | Mex/Crane (SIB)//Tito                                                                                                             |
|                                 | 1983                   | Arcangelo        | Italy          | Creso/Appulo                                                                                                                      |
|                                 | 1983                   | Lloyd            | United States  | Cando/Edmore                                                                                                                      |
|                                 | 1984                   | Altar84          | Mexico         | Ruff/Flamingo, Mex//Mexicali 75/3/Shearwater                                                                                      |

|      |            |               |                                                                                                        |
|------|------------|---------------|--------------------------------------------------------------------------------------------------------|
| 1984 | Duilio     | Italy         | Cappelli//Anhinga/Flamingo, Mex                                                                        |
| 1984 | Primadur   | France        | Blondur//2587-8-6/Leeds                                                                                |
| 1984 | Quadraro   | Italy         | SC-146/ID83-NE                                                                                         |
| 1984 | Tresor     | Italy         | Amber durum/S-22-80                                                                                    |
| 1985 | Adamello   | Italy         | Valforte/Turkis line 7112                                                                              |
| 1985 | Grazia     | Italy         | Leeds (M 6800127)/Valselva                                                                             |
| 1986 | Ambral     | France        | D-76018/Valdur                                                                                         |
| 1987 | Amedeo     | Italy         | Maristella/Capeiti                                                                                     |
| 1987 | AC Avonlea | Canada        | 8267-AD2A/DT612                                                                                        |
| 1987 | Brindur    | France        | Crosby/623//Edmore                                                                                     |
| 1987 | Neodur     | France        | 184-7/Valdur//Edmore                                                                                   |
| 1988 | Agridur    | France        | Edmore//Cimmyt 303/Chandur                                                                             |
| 1988 | Antas      | Italy         | Barrigon-Yaqui-Enano/4/Tehuacan-60/3/Yaktana-54//Norin-10/Brevor/5/Tacur-Tipo-125//Tehuacan-60/Ichnusa |
| 1988 | Plinio     | Italy         | Linea D50/Trigo Candéal                                                                                |
| 1988 | Simeto     | Italy         | Capeit-8/Valnova                                                                                       |
| 1990 | Fenix      | Italy         | Madif/Durum Tunisian//Valgerardo                                                                       |
| 1990 | Ofanto     | Italy         | Adamello/Appulo                                                                                        |
| 1991 | Enduro     | Italy         | Gaviota/Tehuacan-60//Mexicali-75                                                                       |
| 1992 | Cirillo    | Italy         | Jucci/Polesine//Creso/Montanari                                                                        |
| 1992 | Cosmodur   | France        | Natural hybridization of D881 line                                                                     |
| 1992 | Dauno      | Italy         | Gediz-75/Flamingo, Mex//Teal, Mex                                                                      |
| 1992 | Doral      | France        | INRA-164-1-27/IDSN-45                                                                                  |
| 1992 | Exeldur    | France        | Valdur/Regal                                                                                           |
| 1992 | Fauno      | Italy         | Gediz-75/Flamingo, Mex//Teal, Mex                                                                      |
| 1992 | Gianni     | Italy         | Multiple cross among durum wheat cultivar                                                              |
| 1992 | Granizo    | Spain         | Yel S/Shaw S                                                                                           |
| 1992 | Parsifal   | France        | INRA 92-1/D81028                                                                                       |
| 1992 | Zenit      | Italy         | Valriccardo/Vic                                                                                        |
| 1993 | Italo      | Italy         | Complex cross between Italian and Turkish genotypes                                                    |
| 1993 | Kronos     | United States | APB MSFRS POP Sel (D03-12)                                                                             |
| 1994 | Ceedur     | France        | Mondur/2587.8.6//Edmore/Chandur                                                                        |
| 1995 | Arcobaleno | Italy/Spain   | Chen/Altar 84                                                                                          |
| 1995 | Ares       | Italy         | Lira/Vic                                                                                               |
| 1995 | Colosseo   | Italy         | Mutant Mexa/Creso                                                                                      |
| 1995 | Fortore    | Italy         | Capeiti-8/Valforte                                                                                     |
| 1995 | Platani    | Italy         | Valnova/Capeiti-8                                                                                      |
| 1995 | Preco      | Italy         | Edmore/WPB881//Selected line 3                                                                         |
| 1995 | Saadi      | France        | IDSM72-3/711.8                                                                                         |

|      |              |               |                                              |
|------|--------------|---------------|----------------------------------------------|
| 1996 | Bronte       | Italy         | Berillo/Latino                               |
| 1996 | Ciccio       | Italy         | F6 Appulo/Valnova//F5 Valforte/Patrizio      |
| 1996 | Durfort      | France        | Selected from REVA population                |
| 1996 | Iride        | Italy         | Altar 84/Ares                                |
| 1996 | Nefer        | France        | 164/Keops                                    |
| 1996 | Rusticano    | Italy         | n.a.                                         |
| 1996 | San Carlo    | Italy         | Grazia/Degamit                               |
| 1996 | Svevo        | Italy         | CIMMYT's selection/Zenit                     |
| 1996 | Vitromax     | Italy/Spain   | Turchia77/3/Jori/Anhunga//Flamingo, Mex      |
| 1997 | Varano       | Italy         | Capeiti-8/Creso//Creso/3/Valforte/Trinakria  |
| 1998 | AC Navigator | Canada        | Kyle/WB 881                                  |
| 1998 | Baio         | Italy         | Duilio/F21//G76                              |
| 1998 | Cannizzo     | Italy         | F5 Capeiti/Valnova// F5 Patrizio/Valforte    |
| 1998 | Claudio      | Italy         | CIMMYT's selection 35/Durango//IS1938/Grazia |
| 1998 | Martino      | Italy         | Appulo/Produra                               |
| 1998 | Provenzal    | Italy         | CIMMYT's selection (ATO'S CII3EIPUSOA 580)   |
| 1999 | Giotto       | Italy         | W.A 6518-2/GA547                             |
| 1999 | Meridiano    | Italy         | Simeto/WB 881/Duilio/F21                     |
| 1999 | Orobel       | Italy         | Composite INRA/Gil Ble Dur                   |
| 1999 | Quadrato     | Italy         | Creso/Trinakria                              |
| 1999 | Vesuvio      | Italy         | Ofanto/Simeto                                |
| 2001 | Avispa       | Italy         | n.a.                                         |
| 2001 | Fiore        | Italy         | Derived from CIMMYT's selection              |
| 2001 | Tiziana      | Italy         | Peleo/Neodur                                 |
| 2002 | Duetto       | Italy         | 1485 x 83.74                                 |
| 2002 | Dylan        | Italy         | Neodur/Ulisse                                |
| 2002 | Grecale      | Italy         | S2/WB 881//Plinio/F22                        |
| 2002 | Normanno     | Italy         | Simeto/F22//L35                              |
| 2002 | Virgilio     | France        | Acalou/Shoula                                |
| 2003 | Ancomarzio   | Italy         | Stotka//Altar84/Ald                          |
| 2003 | Casanova     | Italy         | Flavio/Syene//Duilio                         |
| 2003 | Chiara       | Italy         | Arcangelo/Fortore                            |
| 2003 | Latinur      | France        | n.a.                                         |
| 2003 | Vendetta     | Italy         | Creso/Ofanto                                 |
| 2004 | L092         | United States | 1A. 1D/Len//Langdon/3/2*Renville             |
| 2004 | L252         | United States | 1A. 1D/Len//Langdon/3/2*Renville             |
| 2004 | Maestrale    | Italy         | Iride/Svevo                                  |
| 2004 | Orfeo        | Italy         | Creso/Simeto                                 |

|                       |           |                       |               |                                                           |
|-----------------------|-----------|-----------------------|---------------|-----------------------------------------------------------|
|                       | 2004      | S99B34                | United States | 1A. 1D/Len//Langdon/3/2*Renville                          |
|                       | 2004      | Saragolla             | Italy         | Iride/Line SPB 0114                                       |
|                       | 2005      | Ariosto               | Italy         | Karim/GA7-X3//Duilio                                      |
|                       | 2005      | Arnacoris             | Italy         | n.a.                                                      |
|                       | 2005      | Canyon                | Italy         | n.a.                                                      |
|                       | 2005      | Imhotep               | Italy         | n.a.                                                      |
|                       | 2005      | PR22D89               | Italy         | Ofanto/Duilio//Ixos                                       |
|                       | 2005      | Strongfield           | Canada        | AC-Avonlea/DT-665                                         |
|                       | 2006      | Alemanno              | Italy         | Cappelli/Duilio                                           |
|                       | 2006      | Ciclope               | Italy         | Trinakria/Berillo//Valnova/Trinakria                      |
|                       | 2006      | K26                   | Italy         | Spontaneuos mutant derived from Simeto/Colosseo           |
|                       | 2006      | UC1113                | Canada        | Kingfisher //Rossia/BD-1419/3/Mexi/CP/4/Waha/5/Yavaros-79 |
|                       | 2007      | Neolatino             | Italy         | Latino/Trinakria//MG1433/4/Latino                         |
|                       | 2007      | Liberdur              | France        | Nefer/acalou//ga7-b14                                     |
|                       | 2007      | Isildur               | France        | n.a.                                                      |
|                       | 2009      | Aureo                 | Italy         | Kofa x Svevo                                              |
|                       | -         | 5-BIL42               | Italy         | Breeding line derived from Latino/MG29896                 |
|                       | -         | PC32                  | Italy         | Breeding line derived from F6 Latino/Primadur             |
|                       | n.a.      | Barcarol              | Italy         | n.a.                                                      |
|                       | n.a.      | Pedroso               | Spain         | n.a.                                                      |
|                       | n.a.      | Sharm 5               | Syria         | Selected from landraces Syrian                            |
|                       | n.a.      | West Bread 881        | United States | Complex cross of Ward, Wells, Cando, Waskana, Mexicali 75 |
| <i>T. turgidum</i>    | K cer     | Egypt                 |               |                                                           |
| <i>ssp. turanicum</i> | Clt-11390 | United State          |               |                                                           |
|                       | PI 68287  | Azerbaijan            |               |                                                           |
|                       | PI 113393 | Iraq                  |               |                                                           |
|                       | PI 167481 | Turkey, Denizli       |               |                                                           |
|                       | PI 191599 | Marocco, Rabat-Sale   |               |                                                           |
|                       | PI 192641 | Morocco               |               |                                                           |
|                       | PI 254206 | Iran                  |               |                                                           |
|                       | PI 278350 | Italy                 |               |                                                           |
|                       | PI 290530 | Hungary, Pest         |               |                                                           |
|                       | PI 306665 | France, Herault       |               |                                                           |
|                       | PI 576854 | Turkey, Diyarbakir    |               |                                                           |
|                       | PI 623656 | Iran, West Azerbaijan |               |                                                           |
|                       | PI 624429 | Iran, Bakhtaran       |               |                                                           |
|                       | PI 127106 | Afghanistan, Faryab   |               |                                                           |
|                       | PI 67343  | Australia, Victoria   |               |                                                           |

|                       |           |                         |
|-----------------------|-----------|-------------------------|
|                       | PI 192658 | Morocco                 |
|                       | PI 184526 | Portugal                |
|                       | PI 352514 | Azerbaijan              |
|                       | PI 362067 | Romania, Brasov         |
| <i>T. turgidum</i>    | PI 56263  | Portugal, Lisboa        |
| <i>ssp. turgidum</i>  | PI 134946 | Portugal, Lisboa        |
|                       | PI 157983 | Italy, Sicily           |
|                       | PI 157985 | Italy, Sicily           |
|                       | PI 173503 | Turkey, Artvin          |
|                       | PI 185723 | Portugal, Leira         |
|                       | PI 191104 | Spain                   |
|                       | PI 191145 | Spain, Baleares         |
|                       | PI 191203 | Spain                   |
|                       | PI 286075 | Poland                  |
|                       | PI 221423 | Portugal                |
|                       | PI 352544 | Switzerland, Vaud       |
|                       | PI 290522 | Germany                 |
|                       | PI 290526 | Hungary, Pest           |
|                       | PI 341391 | Turkey, Burdur          |
|                       | PI 352538 | United Kingdom          |
|                       | PI 352541 | Germany                 |
|                       | PI 352542 | France                  |
|                       | PI 352543 | France                  |
| <i>T. turgidum</i>    | PI 266846 | United Kingdom, England |
| <i>ssp. polonicum</i> | PI 278647 | United Kingdom, England |
|                       | PI 289606 | United Kingdom, England |
|                       | PI 330554 | United Kingdom, England |
|                       | PI 330555 | United Kingdom, England |
|                       | PI 349051 | Georgia                 |
|                       | PI 352487 | Germany, Saxony-Anhalt  |
|                       | PI 352488 | Italy                   |
|                       | PI 352489 | Cyprus                  |
|                       | PI 366117 | Egypt, Sinai            |
|                       | PI 387479 | Ethiopia                |
|                       | PI 566593 | United States           |
|                       | PI 208911 | Iraq                    |
|                       | PI 210845 | Iran                    |
|                       | PI 223171 | Jordan                  |

|                          |                  |                            |
|--------------------------|------------------|----------------------------|
|                          | PI 272564        | Hungary, Pest              |
|                          | PI 286547        | Ecuador                    |
|                          | PI 290512        | Portugal                   |
|                          | PI 306549        | Romania                    |
| <i>T. turgidum</i>       | Citr 7665        | Russian Federation         |
| <i>ssp. carthlicum</i>   | PI 70738         | Iraq                       |
|                          | PI 94755         | Georgia                    |
|                          | PI 115816        | Georgia                    |
|                          | PI 283888        | Iran                       |
|                          | PI 341800        | Russian Federation, Dagest |
|                          | PI 499972        | Georgia                    |
|                          | PI 532501        | Former Soviet Union        |
|                          | PI 572849        | Georgia                    |
|                          | PI 573182        | Turkey, Kars               |
|                          | PI 585017        | Georgia                    |
|                          | PI 585018        | Georgia                    |
| <i>T. turgidum</i>       | Farvento         | Italy                      |
| <i>ssp. dicoccum</i>     | Lucanica         | Italy                      |
|                          | Molise selezione | Italy                      |
|                          | ISC Foggia 152   | Iran                       |
|                          | ISC Foggia 159   | Morocco                    |
|                          | ISC Foggia 161   | United Kingdom             |
|                          | ISC Foggia 171   | Ethiopia                   |
|                          | ISC Foggia 175   | Hungary                    |
|                          | MG 5350          | Ethiopia                   |
|                          | MG 4387          | United Kingdom             |
|                          | MG 5416/1        | Iran                       |
|                          | MG 5471/1        | Spain                      |
|                          | MG 5473          | Spain                      |
|                          | MG 15516/1       | Syria                      |
|                          | MG 5344/1        | Ethiopia                   |
|                          | MG 5293/1        | Italy                      |
|                          | MG 5323          | n.a.                       |
|                          | MG 3521          | n.a.                       |
|                          | MG 5300/1        | n.a.                       |
| <i>T. turgidum</i>       | PI 346783        | Hungary, Pest              |
| <i>ssp. dicoccooides</i> | PI 343446        | Israel                     |
|                          | PI 481539        | Israel                     |

|             |                      |
|-------------|----------------------|
| PI 352323   | Asia Minor           |
| PI 352324   | Lebanon              |
| PI 355459   | Armenia              |
| PI 470944   | Syria, Al Qunaytirah |
| PI 470945   | Syria, Al Qunaytirah |
| MG 4343     | n.a.                 |
| MG 4328/61  | n.a.                 |
| MG 5444/235 | n.a.                 |
| MG 4330/66  | n.a.                 |

---

n.a. not available

Citr and PI number indicate the accession number in USDA National Small Grains Collection, Aberdeen, Idaho, USA.

MG number indicate the accession number in CNR Institute of Plants Genetics, Bari, Italy.

ISC Foggia number indicate the accession number in CRA-CER Cereal Research Centre, Foggia, Italy.
