# Supplementary material for: Genetic dissection of the relationships between grain yield components by genome-wide association mapping in a collection of tetraploid wheats
Source: PubMed Central journal article supplement (PMC5764242; doi:10.1371/journal.pone.0190162), 2018-01-11
Supplement: pone.0190162.s002.pdf [file pone.0190162.s002.pdf]

**S2 Table.** Mean squares from the combined analysis of variance for grain yield per spike, thousand kernel weight and kernel per spike across environments in a tetraploid wheat collection evaluated in seven field experiments (accessions evaluated in the seven trials are included in the ANOVA).

| Source of variation | df   | Grain yield per spike | Thousand kernel weight | Kernel per spike |
|---------------------|------|-----------------------|------------------------|------------------|
| Environment (E)     | 6    | 40.675***             | 15511.346***           | 9257.717***      |
| Blocks/Environment  | 14   | 1.273                 | 88.042                 | 331.146          |
| Genotype (G)        | 199  | 3.777***              | 1770.589***            | 922.288***       |
| G x E               | 1194 | 0.327***              | 54.930***              | 91.662***        |
| Error               | 2786 | 0.060                 | 6.784                  | 15.485           |

\*\*\* Significant at the  $P \leq 0.001$  level.
