# Supplementary material for: Genetic dissection of the relationships between grain yield components by genome-wide association mapping in a collection of tetraploid wheats
Source: PubMed Central journal article supplement (PMC5764242; doi:10.1371/journal.pone.0190162), 2018-01-11
Supplement: pone.0190162.s003.pdf [file pone.0190162.s003.pdf]

**S3 Table. Marker-trait associations for grain yield per spike (GYS), number of kernels per spike (KNS) and thousand kernel weight (TKW) identified by GWAS (model MLM+K) for each of the seven environments (V09, V10, F12, V12, V13, V13\_45, V14) and for the mean across environments in a tetraploid wheat collection.**

| QTL                   | Trait | Marker   | Chrom | Map position (cM) | SNP | SNP Frequency | Environments |       |                    |            |      |                    |            |       |                    |            |      |                    |            |       |                    |            |       |                    |            |      |                    |            |      |                    |  |  |  |
|-----------------------|-------|----------|-------|-------------------|-----|---------------|--------------|-------|--------------------|------------|------|--------------------|------------|-------|--------------------|------------|------|--------------------|------------|-------|--------------------|------------|-------|--------------------|------------|------|--------------------|------------|------|--------------------|--|--|--|
|                       |       |          |       |                   |     |               | V09          |       |                    | V10        |      |                    | F12        |       |                    | V12        |      |                    | V13        |       |                    | G13        |       |                    | V14        |      |                    | Mean       |      |                    |  |  |  |
|                       |       |          |       |                   |     |               | P            | Add   | R <sup>2</sup> (%) | P          | Add  | R <sup>2</sup> (%) | P          | Add   | R <sup>2</sup> (%) | P          | Add  | R <sup>2</sup> (%) | P          | Add   | R <sup>2</sup> (%) | P          | Add   | R <sup>2</sup> (%) | P          | Add  | R <sup>2</sup> (%) | P          | Add  | R <sup>2</sup> (%) |  |  |  |
| <i>QGys.mgb-1A*</i>   | GYS   | IWB57483 | 1A    | 50.4              | A/G | 148/65        | 1.6          | 0.2   | 2.4                | 0.1        | 0.0  | 0.1                | <b>3.2</b> | 0.4   | 5.5                | 0.5        | 0.1  | 0.4                | 0.0        | 0.0   | 0.0                | 0.2        | 0.1   | 0.1                | <b>2.0</b> | 0.3  | 3.0                | <b>2.1</b> | 0.2  | 3.1                |  |  |  |
| <i>QKns.mgb-1A*</i>   | KNS   | IWB57483 | 1A    | 50.4              | A/G | 148/65        | <b>2.6</b>   | 5.1   | 4.4                | 1.3        | 2.9  | 1.8                | <b>4.8</b> | 9.5   | 9.0                | <b>2.2</b> | 5.1  | 3.6                | 1.6        | 3.7   | 2.2                | 1.0        | 2.8   | 1.2                | <b>4.1</b> | 8.0  | 7.5                | <b>4.5</b> | 5.6  | 7.8                |  |  |  |
| <i>QTKw.mgb-1A*</i>   | TKW   | IWB48626 | 1A    | 50.4              | C/T | 170/50        | <b>2.7</b>   | -5.9  | 4.4                | <b>2.1</b> | -5.4 | 3.4                | 1.8        | -4.7  | 2.6                | <b>2.0</b> | -4.7 | 3.0                | <b>4.2</b> | -8.4  | 7.1                | <b>3.6</b> | -8.1  | 5.8                | 1.6        | -4.8 | 2.3                | <b>3.3</b> | -5.9 | 5.4                |  |  |  |
| <i>QTKw.mgb-1B.1*</i> | GYS   | IWB46333 | 1B    | 53.9-57.6         | A/G | 187/28        | 0.0          | 0.0   | 0.0                | 0.3        | -0.1 | 0.2                | 0.4        | -0.1  | 0.4                | 0.7        | 0.1  | 0.7                | 0.5        | -0.1  | 0.4                | 0.0        | 0.0   | 0.0                | 0.3        | -0.1 | 0.3                | 0.2        | -0.1 | 0.1                |  |  |  |
|                       | KNS   | IWB46333 | 1B    | 53.9-57.6         | A/G | 187/28        | <b>2.1</b>   | 5.5   | 3.3                | 1.6        | 4.2  | 2.4                | 0.4        | 1.9   | 0.3                | 1.2        | 3.3  | 1.6                | 1.3        | 4.1   | 1.8                | 1.2        | 3.9   | 1.6                | 1.2        | 4.4  | 1.6                | 1.7        | 3.8  | 2.6                |  |  |  |
|                       | TKW   | IWB46333 | 1B    | 53.9-57.6         | A/G | 187/28        | <b>2.6</b>   | -6.4  | 4.2                | <b>4.4</b> | -9.6 | 8.3                | 1.9        | -5.9  | 2.9                | <b>2.3</b> | -4.3 | 3.5                | <b>2.7</b> | -7.5  | 4.2                | <b>2.3</b> | -6.6  | 2.9                | <b>3.6</b> | -9.2 | 6.3                | <b>3.4</b> | -7.0 | 5.6                |  |  |  |
| <i>QGys.mgb-1B*</i>   | GYS   | IWB66475 | 1B    | 152-155.3         | A/G | 188/29        | 0.4          | 0.1   | 0.3                | <b>2.8</b> | 0.3  | 4.7                | 1.8        | 0.4   | 2.6                | 0.7        | 0.2  | 0.7                | <b>3.9</b> | 0.5   | 6.8                | <b>2.4</b> | 0.4   | 3.7                | <b>3.9</b> | 0.5  | 7.0                | <b>3.4</b> | 0.2  | 5.5                |  |  |  |
|                       | KNS   | IWB66475 | 1B    | 152-155.3         | A/G | 188/29        | 1.4          | 4.6   | 2.0                | 0.4        | 1.4  | 0.3                | 0.3        | 1.7   | 0.2                | 0.8        | 3.0  | 0.9                | 0.8        | 3.2   | 0.9                | 0.2        | 1.1   | 0.1                | 0.4        | 2.3  | 0.3                | 0.1        | 0.3  | 0.0                |  |  |  |
|                       | TKW   | IWB66475 | 1B    | 152-155.3         | A/G | 188/29        | 1.2          | 4.1   | 1.7                | 1.6        | 5.1  | 2.3                | <b>2.3</b> | 6.3   | 3.6                | 1.1        | 3.7  | 1.4                | <b>5.4</b> | 10.8  | 9.8                | <b>4.3</b> | 10.3  | 7.4                | 0.5        | 2.2  | 0.4                | <b>3.2</b> | 6.3  | 5.0                |  |  |  |
| <i>QKns.mgb-2A.1*</i> | GYS   | IWB27389 | 2A    | 113.6-114.7       | A/G | 167/45        | 0.4          | -0.1  | 0.3                | 0.7        | 0.1  | 0.8                | 0.3        | -0.1  | 0.2                | 0.3        | 0.1  | 0.2                | 0.1        | 0.0   | 0.0                | 0.1        | 0.0   | 0.0                | 0.0        | 0.0  | 0.0                | 0.1        | 0.0  | 0.0                |  |  |  |
|                       | KNS   | IWB46763 | 2A    | 113.6-114.7       | A/G | 167/49        | <b>3.7</b>   | -8.0  | 6.7                | 1.8        | -3.9 | 2.7                | <b>4.7</b> | -12.4 | 8.6                | 1.0        | -3.2 | 1.3                | <b>2.8</b> | -5.1  | 4.5                | <b>2.4</b> | -5.5  | 3.8                | <b>2.6</b> | -7.5 | 4.2                | <b>4.2</b> | -5.2 | 7.4                |  |  |  |
|                       | TKW   | IWB27389 | 2A    | 113.6-114.7       | A/G | 167/45        | <b>2.0</b>   | 5.1   | 3.3                | <b>5.6</b> | 9.9  | 10.7               | <b>2.7</b> | 6.3   | 4.5                | <b>2.6</b> | 5.6  | 4.3                | <b>2.6</b> | 6.5   | 4.1                | <b>2.9</b> | 7.3   | 4.6                | <b>2.0</b> | 5.9  | 3.3                | <b>4.1</b> | 6.9  | 7.3                |  |  |  |
| <i>QKns.mgb-2A.2*</i> | GYS   | IWB1937  | 2A    | 181.2             | T/C | 184/31        | 0.5          | 0.2   | 0.4                | 0.3        | 0.1  | 0.2                | 1.2        | 0.4   | 1.5                | 0.2        | 0.1  | 0.1                | 0.8        | 0.2   | 0.9                | 0.7        | 0.2   | 0.8                | 0.3        | 0.1  | 0.2                | 0.3        | 0.1  | 0.3                |  |  |  |
|                       | KNS   | IWB1937  | 2A    | 181.2             | T/C | 184/31        | 0.7          | -3.6  | 0.8                | 0.8        | -3.7 | 1.0                | <b>3.9</b> | -13.7 | 6.9                | 1.0        | -3.5 | 1.2                | <b>4.1</b> | -11.6 | 7.5                | <b>2.7</b> | -9.2  | 4.5                | 1.2        | -6.4 | 1.7                | <b>3.6</b> | -7.9 | 6.3                |  |  |  |
|                       | TKW   | IWB1937  | 2A    | 181.2             | T/C | 184/31        | <b>2.4</b>   | 8.2   | 3.8                | 1.4        | 6.3  | 1.9                | 1.6        | 6.9   | 2.3                | 1.6        | 6.1  | 2.3                | <b>2.8</b> | 10.2  | 4.3                | <b>2.1</b> | 9.0   | 3.0                | 1.2        | 5.9  | 1.5                | <b>2.5</b> | 7.6  | 3.7                |  |  |  |
| <i>QGys.mgb-2B*</i>   | GYS   | IWB2285  | 2B    | 70.4-76.6         | T/C | 161/59        | 0.1          | 0.0   | 0.1                | 0.9        | 0.1  | 1.0                | 0.4        | 0.1   | 0.3                | 0.5        | 0.1  | 0.5                | 0.5        | 0.1   | 0.4                | <b>2.3</b> | 0.4   | 3.5                | <b>3.3</b> | 0.3  | 5.7                | <b>3.0</b> | 0.3  | 4.8                |  |  |  |
|                       | KNS   | IWB2285  | 2B    | 70.4-76.7         | T/C | 161/59        | 0.4          | 1.3   | 0.3                | <b>3.5</b> | 5.3  | 6.1                | <b>2.2</b> | 5.9   | 3.5                | 1.5        | 3.8  | 2.2                | <b>2.3</b> | 4.6   | 3.6                | <b>3.4</b> | 8.3   | 5.7                | <b>3.3</b> | 9.4  | 5.6                | <b>2.7</b> | 5.3  | 4.1                |  |  |  |
|                       | TKW   | IWB2285  | 2B    | 70.4-76.8         | T/C | 161/59        | 0.1          | -0.4  | 0.0                | 0.8        | -2.5 | 0.9                | 1.3        | -3.6  | 1.8                | 0.5        | -1.5 | 0.4                | 0.7        | -2.3  | 0.7                | 0.6        | -2.0  | 0.5                | 0.5        | -1.9 | 0.5                | 0.5        | -1.5 | 0.4                |  |  |  |
| <i>QTKw.mgb-3B*</i>   | GYS   | IWB47344 | 3B    | 148.4             | C/T | 168/48        | 1.1          | -0.2  | 1.5                | <b>2.7</b> | -0.3 | 4.5                | 0.0        | 0.0   | 0.0                | 0.0        | 0.0  | 0.0                | 0.1        | 0.0   | 0.0                | 0.1        | 0.0   | 0.0                | <b>2.3</b> | -0.3 | 3.7                | 0.9        | -0.1 | 1.0                |  |  |  |
|                       | KNS   | IWB47344 | 3B    | 148.4             | C/T | 168/48        | 0.1          | -0.7  | 0.1                | 0.3        | 1.0  | 0.2                | 1.6        | 5.0   | 2.3                | 0.5        | 1.6  | 0.4                | 1.2        | 3.3   | 1.6                | 0.7        | 2.2   | 0.7                | 0.2        | -0.9 | 0.1                | 1.3        | 2.5  | 1.6                |  |  |  |
|                       | TKW   | IWB47344 | 3B    | 148.4             | C/T | 168/48        | 1.4          | -3.9  | 2.0                | <b>5.5</b> | -9.4 | 10.3               | <b>2.2</b> | -5.2  | 3.5                | <b>3.0</b> | -5.3 | 5.1                | 1.7        | -4.5  | 2.3                | <b>2.6</b> | -4.8  | 3.9                | <b>4.1</b> | -8.1 | 7.1                | <b>3.4</b> | -5.6 | 5.5                |  |  |  |
| <i>QGys.mgb-3B*</i>   | GYS   | IWB55725 | 3B    | 186.6             | A/G | 198/19        | 0.1          | 0.0   | 0.1                | 0.2        | -0.1 | 0.1                | 0.0        | 0.0   | 0.0                | 0.7        | -0.2 | 0.7                | <b>3.3</b> | -0.5  | 5.4                | <b>4.1</b> | -0.6  | 7.2                | 1.0        | -0.3 | 1.3                | <b>2.0</b> | -0.3 | 2.8                |  |  |  |
|                       | KNS   | IWB55725 | 3B    | 186.6             | A/G | 198/19        | <b>2.0</b>   | -6.68 | 3.3                | <b>2.6</b> | -6.1 | 4.2                | 0.6        | -3.2  | 0.5                | 0.9        | -3.8 | 1.0                | <b>4.9</b> | -11.7 | 8.9                | <b>5.8</b> | -12.9 | 10.8               | <b>2.1</b> | -7.6 | 3.2                | <b>3.9</b> | -7.4 | 6.4                |  |  |  |
|                       | TKW   | IWB55725 | 3B    | 186.6             | A/G | 198/19        | 0.4          | 2.1   | 0.3                | 0.7        | 3.4  | 0.7                | 0.9        | 4.1   | 1.1                | 0.2        | -1.2 | 0.1                | 0.0        | 0.2   | 0.0                | 0.6        | 3.1   | 0.6                | 0.1        | 0.8  | 0.0                | 0.3        | 1.3  | 0.2                |  |  |  |
| <i>QTKw.mgb-4A*</i>   | GYS   | IWB55207 | 4A    | 61.2              | C/A | 184/30        | 1.5          | 0.2   | 2.1                | 0.9        | 0.2  | 1.1                | 0.3        | 0.1   | 0.2                | 0.3        | 0.1  | 0.2                | 0.4        | -0.1  | 0.3                | 0.4        | 0.1   | 0.3                | 0.0        | 0.0  | 0.0                | 0.3        | 0.1  | 0.2                |  |  |  |
|                       | KNS   | IWB55207 | 4A    | 61.2              | C/A | 184/30        | 0.1          | -0.7  | 0.1                | 0.8        | -2.2 | 0.9                | 0.9        | -3.7  | 1.2                | 0.1        | -0.6 | 0.1                | <b>2.4</b> | -5.9  | 3.8                | 0.5        | -1.9  | 0.4                | 0.9        | -3.5 | 1.1                | 1.6        | -3.4 | 2.2                |  |  |  |
|                       | TKW   | IWB55207 | 4A    | 61.2              | C/A | 184/30        | <b>3.2</b>   | 7.3   | 5.5                | <b>3.8</b> | 8.5  | 6.8                | <b>3.3</b> | 7.6   | 5.6                | 0.8        | 2.7  | 0.8                | <b>2.2</b> | 6.1   | 3.2                | <b>2.7</b> | 6.6   | 4.2                | 1.7        | 5.1  | 2.3                | <b>2.9</b> | 5.8  | 4.5                |  |  |  |
| <i>QGys.mgb-4A*</i>   | GYS   | IWB71701 | 4A    | 167.6-170.9       | C/T | 146/70        | <b>3.8</b>   | 0.3   | 6.7                | 1.5        | 0.2  | 2.2                | <b>3.3</b> | 0.5   | 5.6                | 1.2        | 0.1  | 1.6                | 1.0        | 0.1   | 1.2                | 0.2        | 0.0   | 0.1                | <b>3.0</b> | 0.3  | 5.3                | <b>2.0</b> | 0.1  | 2.8                |  |  |  |
|                       | KNS   | IWB71701 | 4A    | 167.6-170.9       | C/T | 146/70        | <b>5.9</b>   | 6.4   | 11.6               | <b>2.4</b> | 4.0  | 3.9                | <b>2.1</b> | 5.8   | 3.3                | <b>2.1</b> | 3.3  | 3.3                | <b>2.3</b> | 3.5   | 3.6                | 0.7        | 1.7   | 0.8                | <b>3.2</b> | 5.2  | 5.5                | <b>3.6</b> | 3.6  | 6.4                |  |  |  |
|                       | TKW   | IWB71701 | 4A    | 167.6-170.9       | C/T | 146/70        | 0.1          | 0.2   | 0.0                | 0.5        | 2.1  | 0.4                | 1.9        | 4.6   | 2.9                | 0.2        | -0.7 | 0.1                | 1.3        | -2.8  | 1.6                | 1.6        | -3.4  | 2.1                | 0.1        | 0.3  | 0.0                | 0.6        | -1.4 | 0.6                |  |  |  |
| <i>QTKw.mgb-4B*</i>   | GYS   | IWB4448  | 4B    | 103.6-109.1       | T/C | 192/26        | 0.5          | 0.1   | 0.4                | 1.1        | 0.2  | 1.5                | 1.2        | 0.3   | 1.6                | 0.7        | 0.1  | 0.7                | 0.8        | 0.1   | 0.8                | 0.5        | 0.1   | 0.4                | 0.1        | 0.0  | 0.0                | 1.6        | 0.2  | 2.2                |  |  |  |
|                       | KNS   | IWB4448  | 4B    | 103.6-109.2       | T/C | 192/26        | 0.6          | -2.2  | 0.6                | 0.8        | -2.3 | 0.9                | 0.1        | 0.9   | 0.1                | 0.3        | -1.2 | 0.2                | 0.6        | -2.2  | 0.7                | 0.9        | -2.7  | 1.0                | 0.5        | -2.8 | 0.4                | 0.2        | -0.9 | 0.1                |  |  |  |
|                       | TKW   | IWB4448  | 4B    | 103.6-109.3       | T/C | 192/26        | 1.8          | 4.5   | 2.7                | <b>3.8</b> | 9.1  | 6.8                | <b>2.4</b> | 6.0   | 3.8                | <b>2.8</b> | 5.5  | 4.6                | <b>2.6</b> | 5.9   | 3.9                | <b>3.8</b> | 7.3   | 6.2                | 1.7        | 5.3  | 2.4                | <b>3.4</b> | 7.0  | 5.5                |  |  |  |
| <i>QGys.mgb-5A.1*</i> | GYS   | IWB35357 | 5A    | 14.3-23.2         | G/C | 193/27        | <b>4.0</b>   | 0.4   | 7.1                | 1.7        | 0.2  | 2.6                | 1.9        | 0.3   | 2.8                | 1.8        | 0.2  | 2.6                | <b>2.7</b> | 0.2   | 4.3                | 1.1        | 0.1   | 1.5                | 0.5        | 0.1  | 0.5                | <b>3.6</b> | 0.2  | 6.1                |  |  |  |
|                       | KNS   | IWB43705 | 5A    | 14.3-23.2         | A/G | 156/56        | 0.1          | 0.3   | 0.0                | 0.2        | 0.5  | 0.1                | 0.2        | 0.8   | 0.1                | 0.3        | 0.9  | 0.2                | 0.4        | 1.1   | 0.4                | 0.1        | -0.4  | 0.1                | 0.0        | -0.1 | 0.0                | 0.5        | 1.1  | 0.5                |  |  |  |
|                       | TKW   | IWB43705 | 5A    | 14.3-23.2         | A/G | 156/56        | <b>2.8</b>   | 4.3   | 5.0                | <b>2.6</b> | 4.6  | 4.4                | <b>3.0</b> | 4.8   | 5.1                | <b>4.2</b> | 5.5  | 7.6                | <b>2.1</b> | 3.8   | 3.1                | <b>2.1</b> | 4.0   | 3.1                | 1.1        | 2.7  | 1.4                | <b>3.3</b> | 4.2  | 5.5                |  |  |  |
| <i>QGys.mgb-5A.2*</i> | GYS   | IWB71420 | 5A    | 70.8-73.6         | C/T | 183/34        | <b>2.3</b>   | -0.3  | 3.6                | 0.7        | -0.1 | 0.7                | 0.3        | -0.1  | 0.2                | 0.6        | -0.1 | 0.6                | 1.4        | -0.2  | 2.0                | 0.8        | -0.1  | 0.9                | <b>3.4</b> | -0.4 | 6.1                | <b>2.7</b> | -0.2 | 4.1                |  |  |  |
|                       | KNS   | IWB11637 | 5A    | 70.8-73.6         | G/A | 153/58        | 0.3          | -1.1  | 0.2                | 0.8        | 1.9  | 1.0                | 0.2        | 1.0   | 0.1                | 0.0        | -0.1 | 0.0                | 0.0        | 0.0   | 0.0                | 0.6        | 1.6   | 0.6                | 0.9        | -2.7 | 1.1                | 0.2        | -0.6 | 0.1                |  |  |  |
|                       | TKW   | IWB11637 | 5A    | 70.8-73.6         | G/A | 153/58        | <b>2.4</b>   | -4.6  | 3.8                | <b>2.3</b> | -4.6 | 3.6                | 1.6        | -3.8  | 2.4                | <b>3.2</b> | -4.9 | 5.4                | <b>2.6</b> | -5.1  | 4.1                | <b>3.9</b> | -6.9  | 6.6                | <b>3.2</b> | -6.5 | 5.4                | <b>3.8</b> | -5.1 | 6.3                |  |  |  |

|                       |     |          |    |             |     |        |            |      |     |            |      |     |            |      |     |            |      |     |            |      |     |            |      |     |            |      |     |            |      |     |
|-----------------------|-----|----------|----|-------------|-----|--------|------------|------|-----|------------|------|-----|------------|------|-----|------------|------|-----|------------|------|-----|------------|------|-----|------------|------|-----|------------|------|-----|
| <i>QGys.mgb-5A.3*</i> | GYS | IWB12854 | 5A | 111.5-114.3 | T/C | 190/28 | <b>3.6</b> | 0.5  | 6.5 | 1.3        | 0.2  | 1.7 | 1.6        | 0.3  | 2.3 | <b>3.8</b> | 0.4  | 6.4 | 0.9        | 0.2  | 1.0 | <b>2.7</b> | 0.4  | 4.3 | 1.5        | 0.3  | 2.1 | <b>3.4</b> | 0.3  | 5.5 |
|                       | KNS | IWB11972 | 5A | 111.5-114.3 | C/T | 194/24 | <b>3.4</b> | 8.3  | 6.0 | 0.4        | 1.6  | 0.3 | 0.2        | 1.7  | 0.1 | 1.6        | 4.7  | 2.4 | 1.3        | 4.5  | 1.7 | 1.8        | 5.8  | 2.7 | 0.2        | 1.5  | 0.1 | 1.9        | 4.3  | 2.7 |
| <i>QTKw.mgb-5A.3*</i> | TKW | IWB12854 | 5A | 111.5-114.3 | T/C | 190/28 | 1.1        | 4.3  | 1.5 | 1.3        | 4.3  | 1.7 | <b>4.1</b> | 8.6  | 7.3 | <b>2.9</b> | 6.3  | 4.7 | 1.6        | 5.1  | 2.1 | 0.2        | 1.3  | 0.1 | <b>2.9</b> | 8.0  | 4.6 | <b>2.5</b> | 5.5  | 3.7 |
| <i>QGys.mgb-5B*</i>   | GYS | IWB66934 | 5B | 82.0        | T/C | 149/70 | <b>4.4</b> | 0.4  | 8.0 | <b>3.0</b> | 0.3  | 5.0 | <b>4.1</b> | 0.4  | 7.3 | 1.5        | 0.2  | 2.1 | <b>2.5</b> | 0.3  | 3.8 | <b>3.1</b> | 0.3  | 4.9 | <b>3.5</b> | 0.4  | 6.1 | <b>5.4</b> | 0.3  | 9.4 |
|                       | KNS | IWB66934 | 5B | 82.0        | T/C | 149/70 | 1.6        | 3.5  | 2.4 | 1.0        | 2.1  | 1.3 | 0.9        | 2.7  | 1.0 | 0.6        | 1.7  | 0.6 | 0.3        | 1.0  | 0.2 | 0.5        | 1.5  | 0.5 | 1.3        | 3.6  | 1.8 | 1.3        | 2.3  | 1.7 |
| <i>QTKw.mgb-5B*</i>   | TKW | IWB66934 | 5B | 82.0        | T/C | 149/70 | <b>2.7</b> | 5.0  | 4.4 | <b>2.0</b> | 4.2  | 3.0 | <b>3.2</b> | 5.5  | 5.4 | 1.3        | 2.8  | 1.6 | 1.5        | 3.6  | 2.0 | <b>2.5</b> | 5.4  | 3.8 | <b>2.3</b> | 5.4  | 3.8 | <b>2.5</b> | 4.1  | 3.9 |
| <i>QGys.mgb-6A.1*</i> | GYS | IWB23313 | 6A | 0.0-0.1     | C/A | 176/38 | <b>3.9</b> | 0.3  | 7.0 | <b>3.8</b> | 0.3  | 6.7 | 0.7        | 0.2  | 0.8 | 1.6        | 0.2  | 2.2 | <b>2.0</b> | 0.2  | 3.0 | <b>2.4</b> | 0.3  | 3.8 | 1.0        | 0.2  | 1.3 | <b>3.3</b> | 0.2  | 5.2 |
|                       | KNS | IWB23313 | 6A | 0.0-0.1     | C/A | 176/38 | 1.3        | 3.1  | 1.8 | 1.4        | 2.8  | 2.0 | 0.1        | -0.7 | 0.1 | 0.1        | 0.3  | 0.0 | 0.3        | 0.9  | 0.2 | 0.6        | 1.8  | 0.7 | 0.4        | 1.4  | 0.3 | 0.7        | 1.5  | 0.7 |
| <i>QTKw.mgb-6A*</i>   | TKW | IWB23313 | 6A | 0.0-0.1     | C/A | 176/38 | <b>2.6</b> | 4.8  | 4.6 | 1.2        | 3.2  | 1.7 | <b>2.4</b> | 4.9  | 3.9 | 1.4        | 3.2  | 2.0 | 1.8        | 4.0  | 2.4 | <b>2.0</b> | 4.7  | 2.9 | 1.2        | 3.4  | 1.5 | <b>2.1</b> | 3.7  | 3.1 |
| <i>QGys.mgb-6A.2*</i> | GYS | IWB24036 | 6A | 13.9        | C/A | 184/28 | 1.1        | 0.2  | 1.5 | <b>2.1</b> | 0.3  | 3.3 | <b>2.2</b> | 0.3  | 3.4 | <b>3.3</b> | 0.3  | 5.7 | <b>2.3</b> | 0.3  | 3.6 | <b>3.7</b> | 0.4  | 6.3 | 0.3        | 0.1  | 0.2 | <b>3.3</b> | 0.2  | 5.4 |
| <i>QKns.mgb-6A.1*</i> | KNS | IWB24036 | 6A | 13.9        | C/A | 184/28 | 1.5        | 3.8  | 2.2 | <b>3.2</b> | 4.8  | 5.4 | <b>2.7</b> | 6.5  | 4.4 | <b>3.5</b> | 5.8  | 6.1 | <b>2.8</b> | 5.4  | 4.6 | <b>3.5</b> | 6.1  | 5.9 | 0.7        | 2.4  | 0.7 | <b>4.0</b> | 5.0  | 6.5 |
|                       | TKW | IWB24036 | 6A | 13.9        | C/A | 184/28 | 0.5        | 1.8  | 0.4 | 0.4        | 1.6  | 0.3 | 0.4        | 1.4  | 0.3 | 0.3        | -1.1 | 0.2 | 0.1        | -0.5 | 0.0 | 0.0        | -0.2 | 0.0 | 0.4        | -1.8 | 0.4 | 0.1        | 0.4  | 0.0 |
| <i>QGys.mgb-6A.3*</i> | GYS | IWB38787 | 6A | 52.6        | T/C | 187/25 | 0.7        | 0.2  | 0.7 | 1.8        | 0.3  | 2.8 | 1.4        | 0.3  | 2.0 | 0.1        | 0.0  | 0.0 | <b>3.6</b> | 0.5  | 6.3 | <b>3.2</b> | 0.5  | 5.4 | 0.8        | 0.2  | 0.9 | <b>3.1</b> | 0.3  | 4.8 |
| <i>QKns.mgb-6A.2*</i> | KNS | IWB38787 | 6A | 52.6        | T/C | 187/25 | 0.7        | 2.7  | 0.8 | <b>2.6</b> | 5.9  | 4.4 | 1.6        | 6.3  | 2.4 | 0.5        | 2.0  | 0.4 | <b>3.6</b> | 7.8  | 6.4 | <b>3.1</b> | 8.5  | 5.0 | 1.4        | 5.0  | 1.9 | <b>3.2</b> | 5.5  | 5.3 |
|                       | TKW | IWB38787 | 6A | 52.6        | T/C | 187/25 | 0.3        | 1.4  | 0.2 | 0.1        | -0.3 | 0.0 | 0.1        | 0.9  | 0.1 | 0.1        | -0.8 | 0.1 | 0.0        | 0.0  | 0.0 | 1.1        | 4.5  | 1.2 | 0.1        | -0.7 | 0.0 | 0.0        | -0.1 | 0.0 |
|                       | GYS | IWB45190 | 6B | 38.2        | G/A | 183/22 | <b>4.6</b> | 0.5  | 9.0 | 0.9        | 0.2  | 1.0 | 0.7        | 0.2  | 0.7 | 1.6        | 0.2  | 2.5 | 1.3        | 0.2  | 1.7 | 0.1        | 0.0  | 0.0 | 0.1        | 0.0  | 0.0 | 1.6        | 0.2  | 2.3 |
|                       | KNS | IWB45190 | 6B | 38.2        | G/A | 183/22 | 1.9        | 4.7  | 3.2 | 0.1        | 0.3  | 0.0 | 1.1        | -4.4 | 1.5 | 0.3        | 1.2  | 0.2 | 0.2        | 0.9  | 0.1 | 1.1        | -2.9 | 1.5 | 0.7        | -2.5 | 0.8 | 0.2        | 0.7  | 0.1 |
| <i>QTKw.mgb-6B.1*</i> | TKW | IWB45190 | 6B | 38.2        | G/A | 183/22 | <b>3.3</b> | 6.6  | 5.9 | 1.2        | 3.7  | 1.5 | <b>3.3</b> | 7.3  | 5.7 | <b>4.2</b> | 7.1  | 7.9 | 1.7        | 4.3  | 2.2 | 1.2        | 3.5  | 1.5 | 0.9        | 3.0  | 1.0 | <b>2.6</b> | 4.7  | 3.9 |
|                       | GYS | IWB34014 | 6B | 105.5       | T/C | 203/17 | 0.2        | -0.1 | 0.1 | 0.3        | -0.1 | 0.2 | 0.6        | -0.2 | 0.6 | 0.5        | -0.1 | 0.5 | 1.2        | -0.2 | 1.5 | 1.7        | -0.3 | 2.3 | 0.2        | 0.1  | 0.1 | 0.5        | -0.1 | 0.4 |
|                       | KNS | IWB34014 | 6B | 105.5       | T/C | 203/17 | 1.2        | 3.7  | 1.6 | 0.9        | 2.6  | 1.1 | 0.5        | 2.3  | 0.5 | 0.5        | 2.0  | 0.5 | 0.6        | 2.2  | 0.6 | 0.1        | 0.7  | 0.1 | 1.4        | 4.6  | 1.9 | 1.3        | 2.8  | 1.6 |
| <i>QTKw.mgb-6B.2*</i> | TKW | IWB34014 | 6B | 105.5       | T/C | 203/17 | <b>2.6</b> | -5.9 | 4.2 | <b>2.1</b> | -5.4 | 3.2 | <b>3.3</b> | -7.4 | 5.7 | 1.9        | -4.6 | 2.7 | <b>3.1</b> | -6.9 | 4.8 | <b>3.3</b> | -7.7 | 5.3 | 0.8        | -3.1 | 0.9 | <b>3.5</b> | -5.9 | 5.5 |
| <i>QGys.mgb-7A*</i>   | GYS | IWB21281 | 7A | 134.1       | T/G | 188/27 | <b>3.4</b> | 0.5  | 5.9 | 0.1        | 0.1  | 0.1 | 1.7        | 0.4  | 2.4 | 1.6        | 0.3  | 2.3 | <b>4.0</b> | 0.6  | 6.9 | 1.4        | 0.3  | 2.0 | 0.8        | 0.3  | 1.0 | <b>3.6</b> | 0.3  | 6.0 |
| <i>QKns.mgb-7A*</i>   | KNS | IWB21281 | 7A | 134.1       | T/G | 188/27 | <b>2.8</b> | 7.9  | 4.7 | 0.2        | 0.9  | 0.1 | 0.6        | 3.1  | 0.6 | 1.9        | 5.2  | 3.0 | <b>2.6</b> | 7.7  | 4.1 | 0.5        | 2.7  | 0.5 | 1.1        | 5.2  | 1.4 | <b>2.9</b> | 5.6  | 4.7 |
|                       | TKW | IWB21281 | 7A | 134.1       | T/G | 188/27 | 1.2        | 4.9  | 1.7 | 0.4        | 1.9  | 0.3 | 1.1        | 4.2  | 1.4 | 0.8        | 3.1  | 0.9 | 0.4        | 2.0  | 0.4 | 0.4        | 2.1  | 0.3 | 0.5        | 2.7  | 0.4 | 0.8        | 2.7  | 0.8 |
|                       | GYS | IWB33997 | 7A | 189.5       | A/G | 176/37 | 0.8        | -0.1 | 1.0 | 0.6        | -0.1 | 0.6 | 1.0        | -0.2 | 1.3 | 0.1        | 0.0  | 0.0 | 0.6        | -0.1 | 0.5 | 1.0        | -0.1 | 1.2 | 1.6        | -0.2 | 2.3 | 1.1        | -0.1 | 1.3 |
|                       | KNS | IWB33997 | 7A | 189.5       | A/G | 176/37 | 0.6        | 1.7  | 0.6 | 1.7        | 3.0  | 2.5 | 0.6        | 2.2  | 0.7 | 1.1        | 2.7  | 1.4 | 0.9        | 2.2  | 1.0 | 0.2        | 0.8  | 0.1 | 0.2        | 0.9  | 0.1 | 1.2        | 2.2  | 1.5 |
| <i>QTKw.mgb-7A*</i>   | TKW | IWB33997 | 7A | 189.5       | A/G | 176/37 | <b>2.4</b> | -4.4 | 3.9 | <b>3.5</b> | -6.0 | 6.3 | <b>3.8</b> | -6.3 | 6.8 | <b>3.5</b> | -5.3 | 5.9 | 1.9        | -4.2 | 2.6 | <b>2.7</b> | -5.3 | 4.3 | <b>3.5</b> | -6.6 | 5.8 | <b>3.9</b> | -5.3 | 6.4 |
| <i>QGys.mgb-7B.1*</i> | GYS | IWB12937 | 7B | 65.5-73.4   | C/T | 197/22 | <b>3.0</b> | 0.4  | 5.0 | <b>3.7</b> | 0.4  | 6.3 | <b>2.0</b> | 0.5  | 3.0 | <b>3.8</b> | 0.5  | 6.2 | 1.0        | 0.3  | 1.3 | 0.7        | 0.2  | 0.8 | 0.1        | 0.0  | 0.0 | <b>2.4</b> | 0.3  | 3.5 |
|                       | KNS | IWB12937 | 7B | 65.5-73.4   | C/T | 197/22 | 0.5        | 3.0  | 0.5 | 1.9        | 4.3  | 2.8 | 0.9        | 5.2  | 1.1 | <b>2.4</b> | 6.0  | 3.8 | 0.2        | 1.4  | 0.1 | 0.3        | 2.0  | 0.2 | 0.2        | -1.9 | 0.1 | 0.5        | 2.0  | 0.4 |
| <i>QTKw.mgb-7B.1*</i> | TKW | IWB12937 | 7B | 65.5-73.4   | C/T | 197/22 | <b>2.3</b> | 8.4  | 3.7 | <b>2.0</b> | 8.5  | 3.1 | 1.9        | 8.0  | 2.8 | <b>2.3</b> | 7.6  | 3.5 | 1.7        | 7.5  | 2.3 | 0.9        | 5.3  | 1.0 | 1.1        | 6.0  | 1.4 | <b>2.1</b> | 7.0  | 3.0 |
| <i>QGys.mgb-7B.2*</i> | GYS | IWB60564 | 7B | 104.7       | A/G | 179/39 | <b>2.3</b> | 0.4  | 3.7 | <b>4.4</b> | 0.6  | 7.8 | <b>3.6</b> | 0.7  | 6.3 | <b>3.2</b> | 0.6  | 5.4 | 1.9        | 0.4  | 2.9 | 1.3        | 0.3  | 1.7 | 0.9        | 0.3  | 1.1 | <b>3.7</b> | 0.4  | 6.0 |
|                       | KNS | IWB60564 | 7B | 104.7       | A/G | 179/39 | 0.5        | 2.6  | 0.5 | 1.7        | 4.6  | 2.4 | 1.6        | 7.2  | 2.3 | <b>2.5</b> | 8.3  | 4.1 | 0.6        | 2.7  | 0.5 | 0.3        | 1.8  | 0.2 | 0.2        | 1.4  | 0.1 | 1.0        | 3.2  | 1.2 |
| <i>QTKw.mgb-7B.2*</i> | TKW | IWB60564 | 7B | 104.7       | A/G | 179/39 | <b>2.2</b> | 7.2  | 3.4 | <b>2.9</b> | 9.4  | 4.9 | <b>2.4</b> | 7.5  | 3.8 | <b>2.2</b> | 7.8  | 3.5 | 1.5        | 6.3  | 2.0 | 1.6        | 6.9  | 2.2 | 1.1        | 5.3  | 1.4 | <b>2.3</b> | 6.5  | 3.4 |

\* QTL significant at  $-\log_{10}(P) \geq 3.0$  in at least three environments or two environments and in the mean across environments (P value in bold and in red).

° Suggestive QTL significant at  $2.0 \leq -\log_{10}(P) < 3.0$  in at least three environments or two environments and in the mean across environments (P value in bold and in pink).

Chromosome and map position from Maccaferri et al. (2014)

Phenotypic variation ( $R^2\%$ ) explained by the QTL.

Add = Additive effect of the QTL. The + or - sign indicates the positive or negative effect of the SNP allele with higher frequency.
